# Supplementary material for: Tuning the Dielectric and Microwaves Absorption Properties of N-Doped Carbon Nanotubes by Boron Insertion
Source: MDPI journal article supplement (doi:10.3390/nano11051164), 2021-04-29
Supplement: s1 [file s1]

# Supplementary material

## Tuning the Dielectric and Microwaves Absorption Properties of N-Doped Carbon Nanotubes by Boron Insertion

Qingya Sun\*, Xinfang Zhang, Ruonan Liu, Shaofeng Shen, Fan Wu, Aming Xie\*

School of Mechanical Engineering, Nanjing University of Science and Technology, Nanjing 210094, China

School of Mechanical Engineering, Nanjing University of Science and Technology, Nanjing 210094, China; 13687100556@163.com (X.Z.); liuruonan0420@sina.com (R.L.); frank444111@gmail.com (S.S.); wufan@njust.edu.cn (F.W.)

\* Correspondence: sunqingya@njust.edu.cn (Q.S.); xieaming@njust.edu.cn (A.X.)

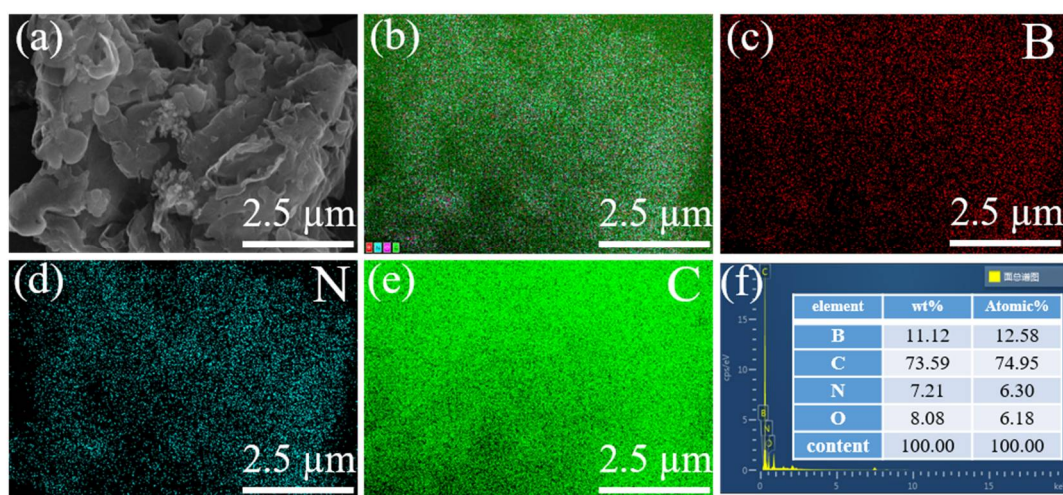

**Figure S1.** Element mapping analysis of B,N-CNT-5: SEM image (a), overall element distribution (b), B element (c), N element (d), C element (e) and element content (f).

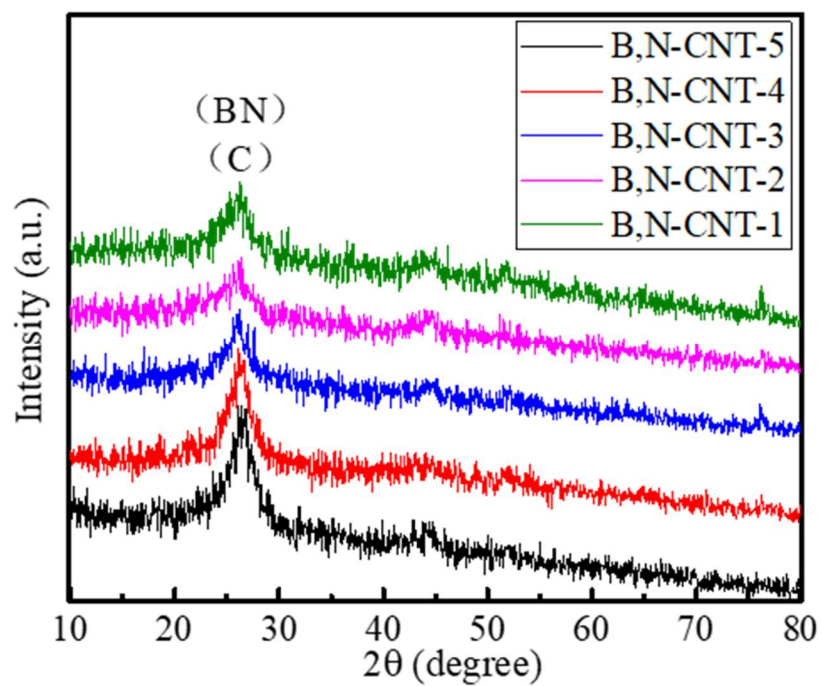

**Figure S2.** The XRD patterns of B,N-CNTs.

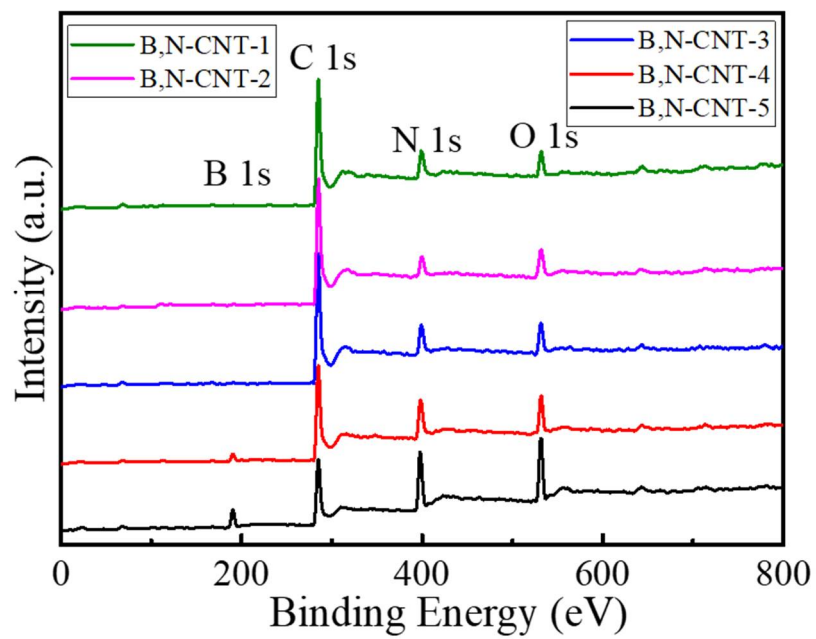

**Figure S3.** The survey spectrums of B,N-CNTs.

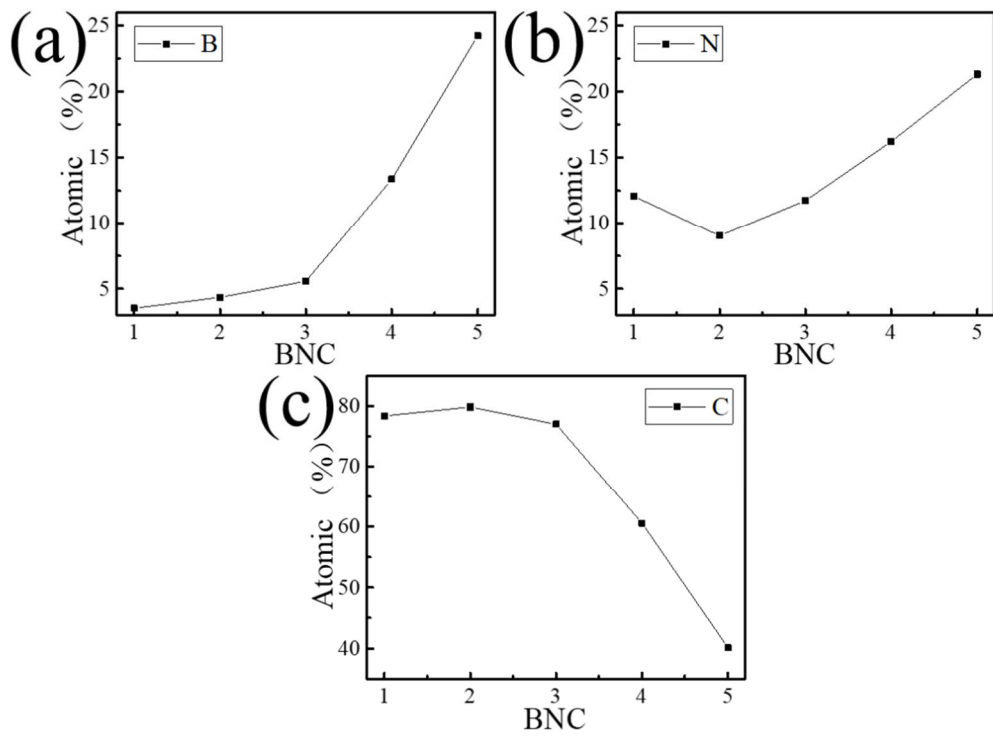

**Figure S4.** The atomic ratios of B (a), N (b) and C (c) in B,N-CNTs.

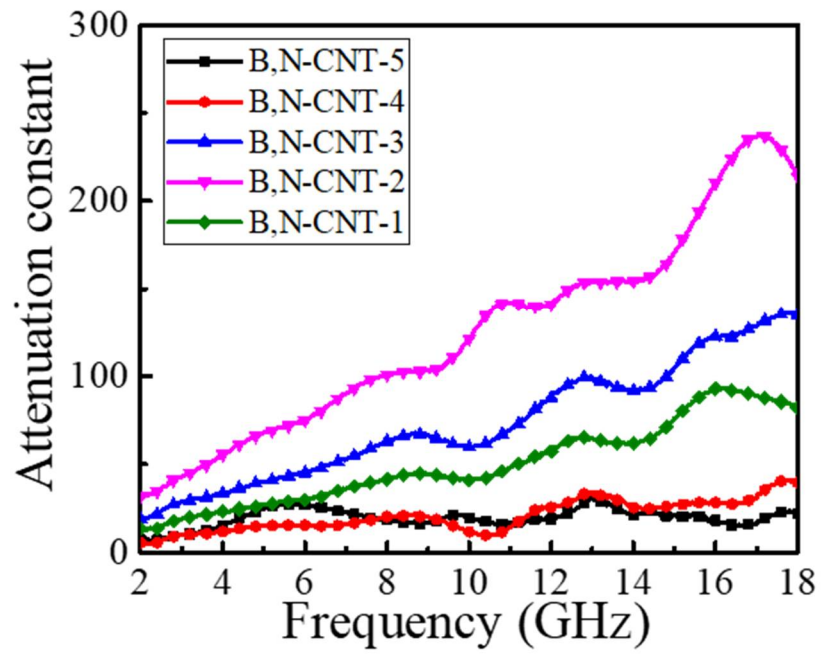

**Figure S5.** The Attenuation Constant curves of B,N-CNTs.

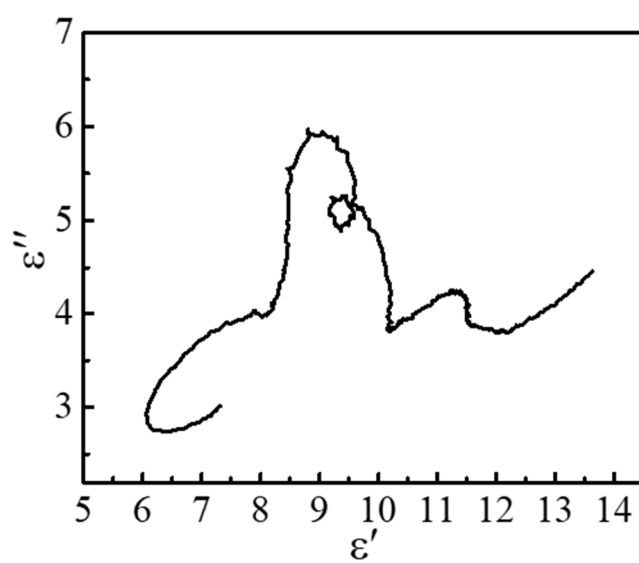

**Figure S6.** The Cole-Cole curve of B,N-CNT-2.
